# Supplementary material
Source: PubMed Central journal article supplement (PMC6148446)
Supplement: blood821769-suppl1.pdf [file blood821769-suppl1.pdf]

## 1 SUPPLEMENTAL METHODS

### 3 Vectors

5 The IKZF3 reporter vector ("Aiolos aa130-189 in Artichoke", Addgene #74451)  
6 contains SFFV.IKZF3(aa130-189)-17aaRigidLinker-EGFP.IRES.mCherry.cppt.EF1a.PuroR in a  
7 lentiviral backbone. The EF1a.PuroR and lentiviral backbone were derived from the Zhang lab  
8 LentiGuide-Puro plasmid (Addgene #52963). A derivative version of the IKZF3 reporter was generated  
9 which lacks EF1a.Puro ("Aiolos aa130-189 in Pea", Addgene #74459). The gRNA-EGFP vector used  
10 for flow cytometry-based competition assays ("Banana", Addgene) contains  
11 U6.gRNAclonesite.Scaffold.cppt.EF1a.PuroR.IRES.EGFP in a lentiviral backbone also derived from  
12 LentiGuide-Puro (Feng Zhang, Addgene #52963). gRNAs were cloned into the vector using BsmBI  
13 restriction enzyme sites. LentiGuide-Puro (Addgene #52963) and pLentiCas9-Blast (Addgene #52962)  
14 were both generated by the Feng Zhang lab. The following gRNAs sequencing were used for MM1S,  
15 NCIH929 and HEK293T CRISPR knockout experiments:

|    |                       |                        |
|----|-----------------------|------------------------|
| 17 | <i>CRBN</i> _gRNA_1   | GCACCATACTGACTTCTTGA   |
| 18 | <i>CRBN</i> _gRNA_2   | TTACATACTGTATGTGATGT   |
| 19 | <i>COPS5</i> _gRNA_1  | ACAGCAGCAAGAAATCCTGG   |
| 20 | <i>COPS5</i> _gRNA_2  | GGAGGCAACTTGGAAGTGAT   |
| 21 | <i>UBE2M</i> _gRNA_1  | GCGCAGCTGCGGATCCAGAA   |
| 22 | <i>UBE2M</i> _gRNA_2  | TCCTGGAGCCAGGTGGGCCA   |
| 23 | <i>UBE2D3</i> _gRNA_1 | AATGACAGCCCATATCAAGG   |
| 24 | <i>UBE2D3</i> _gRNA_2 | CTTGCCTTAGGTGGTTTGAA   |
| 25 | <i>UBE2G1</i> _gRNA_1 | TGACAATGATCTCTACCGAT   |
| 26 | <i>UBE2G1</i> _gRNA_2 | CTACTGCGAAGACAGCTGGC   |
| 27 | Control_gRNA_1        | GACGGAGGCTAAGCGTCGCAA  |
| 28 | Control_gRNA_2        | GCGCTTCCGCGGCCCGTTCAA. |

30 All novel vectors derived for use in this paper have been deposited in Addgene under "Ebert Lab".

### 33 Genome-Scale CRISPR-Cas9 Screen

35 The optimal lenalidomide dose and endpoints for the screen were identified using *CRBN* as a positive  
36 control. MM1.S cells with stable expression of Cas9 (pLentiCas9-Blast, Addgene #52962) were infected  
37 with a non-targeting control gRNA or *CRBN*-targeting gRNA + EGFP. The infected cells were then  
38 selected with 1µg puromycin for three days, then day 8 post-infection the control and *CRBN*  
39 populations were mixed at a 99:1 ratio respectively and cultured in lenalidomide (Selleck Chemicals) for  
40 20 days (Figure S1). Cells were dosed every two days and passaged every four. With each passage,  
41 the percentage of EGFP+ cells was measured using flow cytometry. The minimal lenalidomide dose  
42 required to elicit >60 fold enrichment by day 12 was 1µM lenalidomide, and we added a day 20  
43 endpoint to identify hits with smaller effect sizes than *CRBN*.

45 For the genome-scale screen, we used the same MM1.S-Cas9 cells as those used in the above  
46 optimization assays. On day -8 of the screen the MM1.S-Cas9 cells were infected with the Human  
47 GeCKOv2 LentiGuide-Puro library (Addgene #100000048, Broad Genetic Perturbations Platform),

48 and on day -7 the cells were selected with 1ug/mL puromycin for three days. The infection efficiency on  
49 day -4 was calculated to be 46% and the cells were passaged into puromycin-free media. Given a  
50 library size of ~120,000, we calculated that 120 and 60 million cells would result in a representation of  
51 each gRNA 1000 times and 500 times respectively. On day 0, 120 million cells were collected as a  
52 baseline control, 60 million cells were plated for DMSO treatment, and 6 replicates of 120 million cells  
53 were plated for 1µM lenalidomide treatment (3 replicates for the day 12 endpoint, and 3 replicates for  
54 the day 20 endpoint). The cells were dosed every two days with either DMSO or 1µM lenalidomide and  
55 passaged every four, maintaining a cell density of ~1 million/mL. On day 12, 60 million cells from the  
56 DMSO arm, and all remaining cells in the day 12 lenalidomide replicates were pelleted. On day 20, the  
57 screen concluded by pelleting 60 million cells from the DMSO arm and all remaining cells in the day 20  
58 lenalidomide replicates.

59  
60 We purified genomic DNA from the cell pellets using the Qiagen DNA Blood Maxi kit (Qiagen #51192).  
61 The gRNA sequences were the PCR amplified from the gDNA using primers tailed with barcodes and  
62 Illumina sequencing adaptors. The resulting amplicons were then pooled and sequenced across four  
63 lanes of the Illumina HiSeq. Reads counts were normalized and log2 transformed, and the triplicate  
64 read counts for a given gRNA were averaged. To identify gRNAs which increased in frequency in the  
65 lenalidomide treatment condition we subtracted the DMSO read count for a given gRNA from the  
66 corresponding lenalidomide day 12 or day 20 read count. The STARS algorithm was employed to  
67 collapse the gRNA enrichment results by gene and generate statistics (Mudra Henge and John  
68 Doench, Broad Genetic Perturbations Platform, <http://www.broadinstitute.org/rnai/public/software/stars>).

69

## 70 **IKZF3 reporter counter screen**

71

72 We designed gRNAs for the top 30 genes identified in the genome-scale screen (FDR<0.05) using the  
73 Broad Genetic Perturbations Platform gRNA prediction algorithm  
74 (<https://www.broadinstitute.org/rnai/db/analysis-tools/sgRNA-design>). Three gRNAs per gene were  
75 chosen with priority given to gRNAs low predicted off-target effects, location in the first 30% of the  
76 protein, and target sequences located in different exons. 12 gRNAs targeting no known sequences  
77 were included as negative controls. gRNAs were ordered from IDT as paired, single-stranded oligos,  
78 after which they were annealed and cloned using BsmBI restriction enzyme sites into the LentiGuide-  
79 Puro vector (Addgene #52963). The resulting plasmids were then pooled and used to generate a  
80 lentiviral library

81

| <b>Gene_gRNA</b> | <b>gRNA Sequence (5'-3')</b> |
|------------------|------------------------------|
| <b>CRBN_1</b>    | GCACCATACTGACTTCTTGA         |
| <b>CRBN_2</b>    | GGGCGGTTACCAGGCAGGAG         |
| <b>CRBN_3</b>    | TTACATACTGTATGTGATGT         |
| <b>GPS1_1</b>    | CCAGGATCTGGAACAGTACG         |
| <b>GPS1_2</b>    | TTAAACACCTGAACCGGCAG         |
| <b>GPS1_3</b>    | ACCTGACGTCAACTACGTGG         |
| <b>COPS2_1</b>   | GGAATTCTATGAAACAACAC         |
| <b>COPS2_2</b>   | TTATATCTCTACTTCTAAAC         |
| <b>COPS2_3</b>   | GGCATTAAAGCAGTTTCCAAA        |
| <b>COPS3_1</b>   | ACTGTTACGAACTGCTCCA          |
| <b>COPS3_2</b>   | AGGATGCCAATTCCTCGCAG         |

**COPS3\_3** GATGGGATAAGTTCTTCGCA  
**COPS4\_1** GCCCAGCTCATGAATTCGAG  
**COPS4\_2** AGAAATCTATCACTTCACCT  
**COPS4\_3** AATGCAGCCCAAGTGTTGGT  
**COPS5\_1** ACAGCAGCAAGAAATCCTGG  
**COPS5\_2** GGAGGCAACTTGGAAGTGAT  
**COPS5\_3** GCCTTGAAAATGCAATCGGG  
**COPS6\_1** GAGATGTTGAGAATGACAAG  
**COPS6\_2** GCTCTGATTGGCAAGCAGGA  
**COPS6\_3** GCAGCTACGAACGGGACCGG  
**COPS7A\_1** AAACACTGTGAGCAGCCGGA  
**COPS7A\_2** CAGCTGCCGCACATTACGCA  
**COPS7A\_3** GAATCTTCCTCCACTAACAG  
**COPS7B\_1** TCAAGGCCAGAGAATGGCAG  
**COPS7B\_2** TCTTGATGCCAAGCTCACGA  
**COPS7B\_3** GGGACATACCCAGATTACAT  
**COPS8\_1** GCTGGACCGTCTCAGACCAC  
**COPS8\_2** AGAAGCTGACCATACTGG  
**COPS8\_3** GGCCGCGAAGATGCCAGTGG  
**CAND1\_1** CCAGCCCTAGACTTGCAAGT  
**CAND1\_2** GCAGAAAGATTCCATCAAGT  
**CAND1\_3** AGATGAAGATGAAAATGCAA  
**DDB1\_1** CGACATGTCGTACAACACTACG  
**DDB1\_2** CTACCAACCTGCGATCACCA  
**DDB1\_3** TGACATGCAGCTCCTCCAGG  
**GLMN\_1** AAGAGATAGCTGATTCCAAA  
**GLMN\_2** AGAATTGTGCTGTCAGCAA  
**GLMN\_3** AATATGGGCTGGAATCTCGT  
**OTUB1\_1** CCAGCCGCTCTGACACCAGA  
**OTUB1\_2** GCGCTGTTTAAAGATGGCGG  
**OTUB1\_3** GCAGGACCGAATTCAGCAAG  
**PLAA\_1** GTAAAGATCTTACCTGAACA  
**PLAA\_2** AGACTTTGTGACAACAGCAG  
**PLAA\_3** TGAGGGTAGATGTCACTTGA  
**UBE2M\_1** GCGCAGCTGCGGATCCAGAA  
**UBE2M\_2** TCCTGGAGCCAGGTGGGCCA  
**UBE2M\_3** TGACCAGCTTGAAGTTGAGG  
**UBE2D3\_1** AATGACAGCCCATATCAAGG  
**UBE2D3\_2** TACTTACTATCATCCCCAAC  
**UBE2D3\_3** CTTGCCTTAGGTGGTTTGAA  
**UBE2G1\_1** TGACAATGATCTCTACCGAT  
**UBE2G1\_2** ACAGAAATCTGGCACCCAAA  
**UBE2G1\_3** CTACTGCGAAGACAGCTGGC  
**TRAF2\_1** TGTGCTGCCTGTGTTACGA  
**TRAF2\_2** GGGGACCCTGAAAGAATACG

|                  |                       |
|------------------|-----------------------|
| <b>TRAF2_3</b>   | GGACACTCACCTTCTCCCGG  |
| <b>EDC4_1</b>    | TACTCACCCCGAATGGCAT   |
| <b>EDC4_2</b>    | AGTGGAAACCTCATGATGGG  |
| <b>EDC4_3</b>    | GTCCATATTCGGCAGCCAGA  |
| <b>NCOR1_1</b>   | TTGCTTTCAGAATTTCAACC  |
| <b>NCOR1_2</b>   | CCATGAGCTGATCATAACGC  |
| <b>NCOR1_3</b>   | TCATGTTTAGAGTTGGGCAG  |
| <b>DEPDC5_1</b>  | TTAGTCGCCACATATCCCCA  |
| <b>DEPDC5_2</b>  | TCATGATCCTGACCAAGCAG  |
| <b>DEPDC5_3</b>  | GATCCTGTCTGAATTGAGGCT |
| <b>SRP14_1</b>   | GCTGATCTTCTTCTCCCAT   |
| <b>SRP14_2</b>   | TATAGACGCTGCCCGACGTC  |
| <b>SRP14_3</b>   | GGTGTGTTGGAGAGCGAGC   |
| <b>XRN1_1</b>    | GCAAAAATGAACCAGCAGCG  |
| <b>XRN1_2</b>    | TTTACAGATGGATCTCAGAG  |
| <b>XRN1_3</b>    | TCTCAAATCGAGGTAAGTTG  |
| <b>EIF4A1_1</b>  | CTCTGCTCAGATACAGAAGG  |
| <b>EIF4A1_2</b>  | GAGGTCTCACCTTGATACA   |
| <b>EIF4A1_3</b>  | TCTCACCTCGATGACGCCTT  |
| <b>SNRNP25_1</b> | GGCACTCTGCACTACAACCA  |
| <b>SNRNP25_2</b> | ATCGGCAGATCGCAGAGCAG  |
| <b>SNRNP25_3</b> | AATAGCCCTAGAATACGGCC  |
| <b>RARA_1</b>    | AAGCAAGGCTTGTAGATGCG  |
| <b>RARA_2</b>    | AGAGTGGTCAGAGCGCCTGG  |
| <b>RARA_3</b>    | TGTTCTTCTGGATGCTGCGG  |
| <b>PPP6C_1</b>   | ACAAGTATGTGGAAATAGCG  |
| <b>PPP6C_2</b>   | CAGTTCTGAACAGTTCACAA  |
| <b>PPP6C_3</b>   | TGAGAGTAGACAGATAACAC  |
| <b>SPOP_1</b>    | CCTCCGGCAGAAATGTCGAG  |
| <b>SPOP_2</b>    | GTTTGCGAGTAAACCCCAAA  |
| <b>SPOP_3</b>    | GCAAAGCTAAAGTTATTGA   |
| <b>SYCP2L_1</b>  | AGTCCCTGCCGAATTAGCAG  |
| <b>SYCP2L_2</b>  | GATTCCTTCTACTTAGCTT   |
| <b>SYCP2L_3</b>  | AAGAAGCCTCGTTATGCAAG  |
| <b>DCP2_1</b>    | CATCATGGAGACCAAACGGG  |
| <b>DCP2_2</b>    | GTTCAATCTGAAAACACACT  |
| <b>DCP2_3</b>    | TCACCTTGAGGCAGCAAAA   |
| <b>NFKBIA_1</b>  | GAGCCGCAGGAGGTGCCGCG  |
| <b>NFKBIA_2</b>  | GGTTGGTGATCACAGCCAAG  |
| <b>NFKBIA_3</b>  | GACCATGGAAGTGATCCGCC  |
| <b>RBX1_1</b>    | ATGGATGTGGATACCCCGAG  |
| <b>RBX1_2</b>    | ACCGTGTGTTTCCAAAATGG  |
| <b>RBX1_3</b>    | CACAATATCCCAGGCCCAGA  |
| <b>CUL4A_1</b>   | GCAGGACCACTGCAGACAAA  |
| <b>CUL4A_2</b>   | GAGGACACTCACCAGATGGA  |

**CUL4A\_3** CGAGCGCGAGAGGAGCGGCG  
**CUL4B\_1** GCAAAAAGTAAAGAAGCAG  
**CUL4B\_2** GTTTGATGCGAAGATGGCTG  
**CUL4B\_3** GCTACTACCTCTAAAGACGG  
**Control\_1** GACGGAGGCTAAGCGTCGCAA  
**Control\_2** GCGCTTCCGCGGCCCGTTCAA  
**Control\_3** GATCGTTTCCGCTTAACGGCG  
**Control\_4** GGTAGGCGCGCCGCTCTCTAC  
**Control\_5** GCCATATCGGGGCGAGACATG  
**Control\_6** GTACTAACGCCGCTCCTACAG  
**Control\_7** GTGAGGATCATGTCGAGCGCC  
**Control\_8** GGGGCCCGCATAGGATATCGC  
**Control\_9** GTAGACAACCGCGGAGAATGC  
**Control\_10** GACGGGCGGCTATCGCTGACT  
**Control\_11** GCGCGGAAATTTTACCGACGA  
**Control\_12** GCTTACAATCGTCGGTCCAAT

82

83 NCIH929 and HEK293T cells were transduced with pLentiCas9-Blast (Addgene #52962) and selected  
 84 with 2µg/mL blasticidin to generate stable Cas9-expressing lines. The MM1.S-Cas9, NCIH929-Cas9,  
 85 and HEK293T-Cas9 cells were then transduced with the IKZF3 reporter (“Aiolos aa130-189 in Pea”,  
 86 Addgene #74459) and infected cells were isolated using Fluorescence Activated Cell Sorting (BD  
 87 FACS Aria). On day 0 of the screen three technical replicates of each reporter cell type were infected  
 88 with the lentiviral library at an infection efficiency below 50%, and on day 1 the cells were selected with  
 89 1 or 2µg/mL puromycin. On day 4 cells were passaged into puromycin-free media, and on day 11 the  
 90 cells were dosed for 20 hours with DMSO or 1µM lenalidomide. On day 12, unsorted baseline controls  
 91 were harvested from both the DMSO and 1µM lenalidomide treatment groups, and 1µM lenalidomide-  
 92 treated cells were then sorted for cells remaining EGFP+.

93

94 Genomic DNA was isolated from the resulting cell pellets using the QiaAmp DNA Blood Midi and Micro  
 95 Kits (Qiagen #51183, #56304). We then PCR-amplified the gRNA sequences using primers tailed with  
 96 barcodes and Illumina sequencing adaptors. The resulting amplicons were pooled and then sequenced  
 97 across a single lane of the Illumina NextSeq. Reads counts were normalized and log<sub>2</sub> transformed. To  
 98 identify gRNAs which increased in frequency in the lenalidomide-treated EGFP+ population we  
 99 subtracted the DMSO gRNA read count from the corresponding, EGFP+ 1µM lenalidomide read count,  
 100 and then averaged the triplicate values. The averaged, log<sub>2</sub> fold enrichment was then normalized to the  
 101 average enrichment of the 12 non-targeting control gRNAs.

102

103

#### 104 **Cell Culture**

105

106 MM1.S (MM.1s, multiple myeloma, ATCC #2974) and NCIH929 (multiple myeloma, Broad Institute Cell  
 107 Line Repository) were grown in RPMI supplemented with 10% fetal bovine serum, penicillin, and  
 108 streptomycin.

109

110 HEK293T cells were single cell cloned via limiting dilution and subsequently grown for ~21 days prior to  
 111 harvesting. Genomic DNA purification was performed using the Zymo Research ZR-96 Quick-gDNA

112 kit (#D3012). PCR amplification of the genomic DNA target sites was performed with site-specific  
113 primers and sequenced via next generation sequencing at the MGH CCIB DNA Core.

114

### 115 **Viability Assays**

116

117 NCIH929-Cas9 cells infected with control or *UBE2G1* gRNAs were treated with DMSO, pomalidomide  
118 (Selleck), or CC-122 (Medkoo, Morrisville, NC, USA) for 10 days, with dosing at Day 0 and Day 5. At  
119 day 10, cell viability was measured using Cell Titer-Glo Luminescent Cell Viability Assays (Promega,  
120 Madison, WI, USA) and analyzed on an Envision Plate Reader (Perkin Elmer, Waltham, MA, USA).

121

122

123

124

### 125 **Competition Assays**

126

127 gRNAs targeting genes of interest were cloned using BsmBI restriction enzyme sites into the gRNA-  
128 EGFP reporter vector ("Banana", Addgene) and HEK293T cells were used to generate lentivirus.  
129 MM1.S cells stably expressing Cas9 (pLentiCas9-Blast Addgene #52962) were infected with the either  
130 the gRNA-EGFP vector or control gRNAs in LentiGuide-Puro vector (Addgene #52963), selected in  
131 1ug/mL puromycin for three days, and then expanded for 20 days until sufficient cell numbers were  
132 achieved for the experiment.

133

134 Two biological replicates (different gRNAs targeting same gene) and three technical replicates were  
135 performed.

136

### 137 **Reporter Assays in HEK293T Single Cell Clones**

138

139 Single cell HEK293T cell clones were transduced with the IKZF3 aa130-189 reporter vector ("Aiolos  
140 aa130-189 in Artichoke", Addgene #74451) and selected for three days with 2ug/mL puromycin. On  
141 day 0, 15,000 cells were plated per well in a 96-well plate. On day 1 the cells were dosed with a titration  
142 of doses of lenalidomide (HP D300 digital dispenser) and 20 hours later on day 2 the cells were  
143 harvested for flow cytometry to read the EGFP and mCherry fluorescence. Analysis consisted of  
144 calculating the EGFP:mCherry fluorescence ratio on a per-cell basis and then taking the geometric  
145 mean of the values for ~1000 cells. Three experimental replicates were performed.

146

147

### 148 ***In Vitro* Ubiquitination Assays**

149

150 *In vitro* ubiquitination assay was run on Tris-Glycine SDS-PAGE gel and immunoblotted as indicated.  
151 Secondary antibodies IRDye 800CW Goat anti-rabbit 926-32211 and IRDye680LT Goat anti-mouse  
152 926-68020 were purchased from Licor and imaged on Licor Odyssey.

153

154

### 155 **Immunoblots**

156

157 Cells were washed with phosphate buffered saline and lysed in buffer (150 mM NaCl, 50 mM Tris pH  
158 7.5, 1% NP-40, 1% glycerol, 1X Halt Cocktail protease and phosphatase inhibitors) for 20 minutes on

159 ice. Cullin probed lysates were lysed with additional 2mM 1,10-orthophenathroline (SIGMA). To  
160 pre-clear cell lysates, we centrifuged at 13,000 rpm at 4°C for 15 minutes. We measured protein  
161 concentration with Pierce BCA protein assay kit and resolved lysates on BioRad any kD TGX  
162 polyacrylamide gels by SDS-PAGE and transferred by electrophoresis to nitrocellulose membrane (Life  
163 Technologies) at 100V for 70 minutes. Membranes were blocked in 5% milk/ TBST for 1 hour. Blots  
164 were incubated, with indicated primary antibody, overnight at 4°C. The membrane was then washed in  
165 TBST, three times at 15 minute intervals, before 1 hour secondary horseradish peroxidase-conjugated  
166 antibody incubation at room temperature. We again washed nitrocellulose membranes in TBST, three  
167 times for 15 minutes, prior to enhanced chemiluminescent substrate detection (Pierce).

168

169

## 170 **Antibodies**

171

172 Anti-HA (#2367), anti-UBE2M (# 4913), anti- $\beta$  Actin (#3700) primary antibodies were purchased from  
173 Cell Signaling Technologies. Anti-CK1 $\alpha$  (sc-6477) and anti-IKZF1 (sc-13039) were obtained from  
174 Santa Cruz. Anti-CRBN (#NBP1-918010) and Anti-IKZF3 (NBP2-16938) antibodies were acquired  
175 from Novus. Antibodies detecting UBE2G1 (ab135508), UBE2D3 (ab127578), COPS5 (ab12323), and  
176 cullin 4A (ab72548) were purchased from Abcam. Horseradish peroxidase-conjugated anti-rabbit and  
177 anti-mouse immunoglobulin G (IgG) antibodies were purchased from Millipore

178  
179

## SUPPLEMENTAL FIGURES

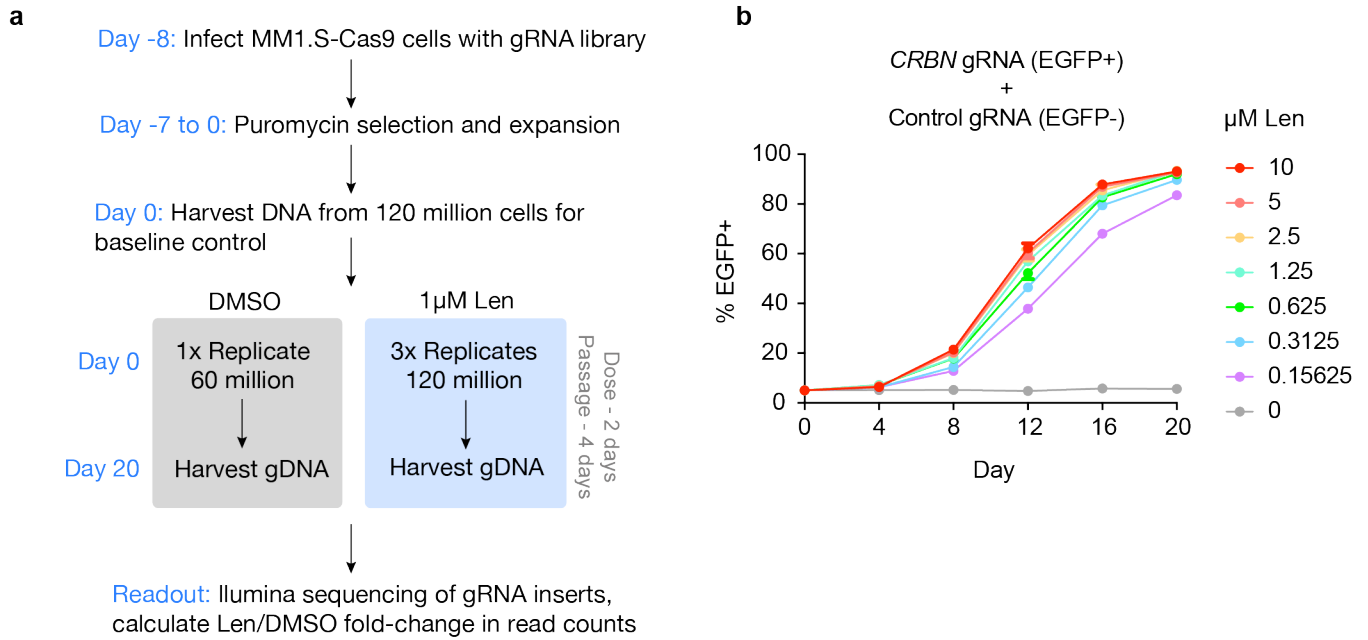

180  
181  
182  
183  
184  
185  
186  
187

### Figure S1 | *CRBN* is required for lenalidomide's anti-myeloma effects and is a non-essential gene

**a**, Detailed schematic of the genome-scale CRISPR-Cas9 screen.

**b**, MM1.S-Cas9 cells expressing EGFP were infected with gRNAs targeting *CRBN* and mixed at a 5:95 ratio with control gRNA-infected cells lacking EGFP. The cells were then grown for 20 days in the presence of lenalidomide and the percentage of EGFP+ cells was quantified every four days using flow cytometry.



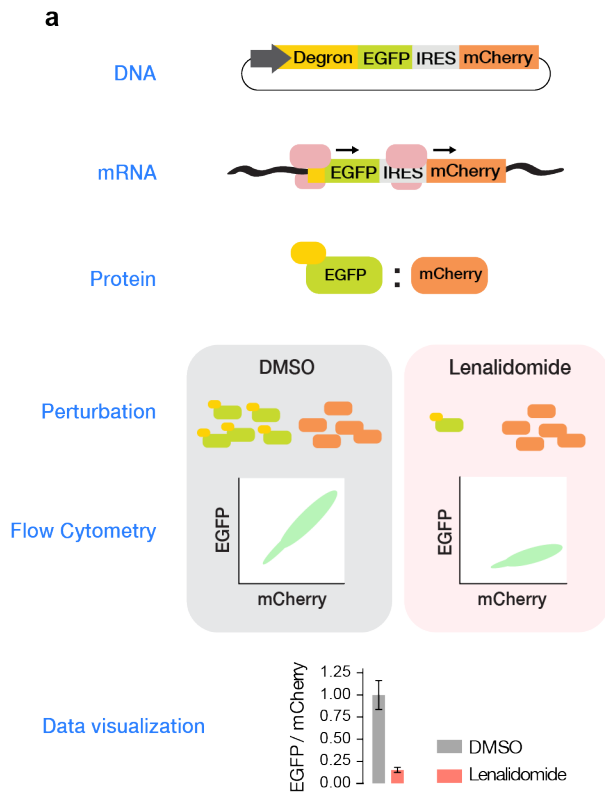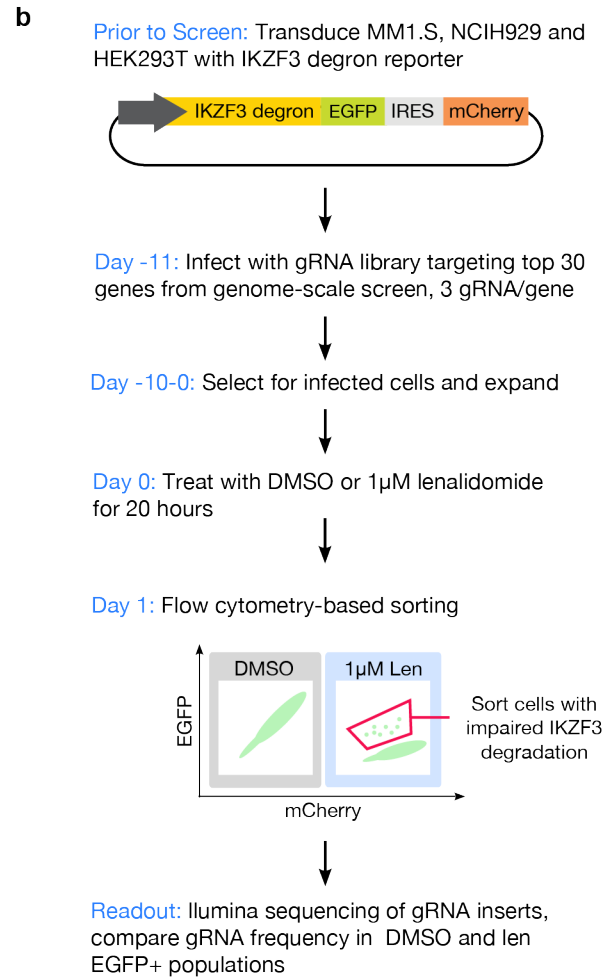

188  
189  
190  
191  
192  
193  
194  
195  
196  
197  
198  
199  
200  
201  
202  
203  
204  
205  
206  
207  
208  
209

**Figure S2 | IKZF3 degron reporter vector and detailed schematic of the counter screen**

**a**, Schematic of the reporter vector and how it functions.

**b**, Detailed overview of the reporter-based flow cytometry counter screen.

210  
211

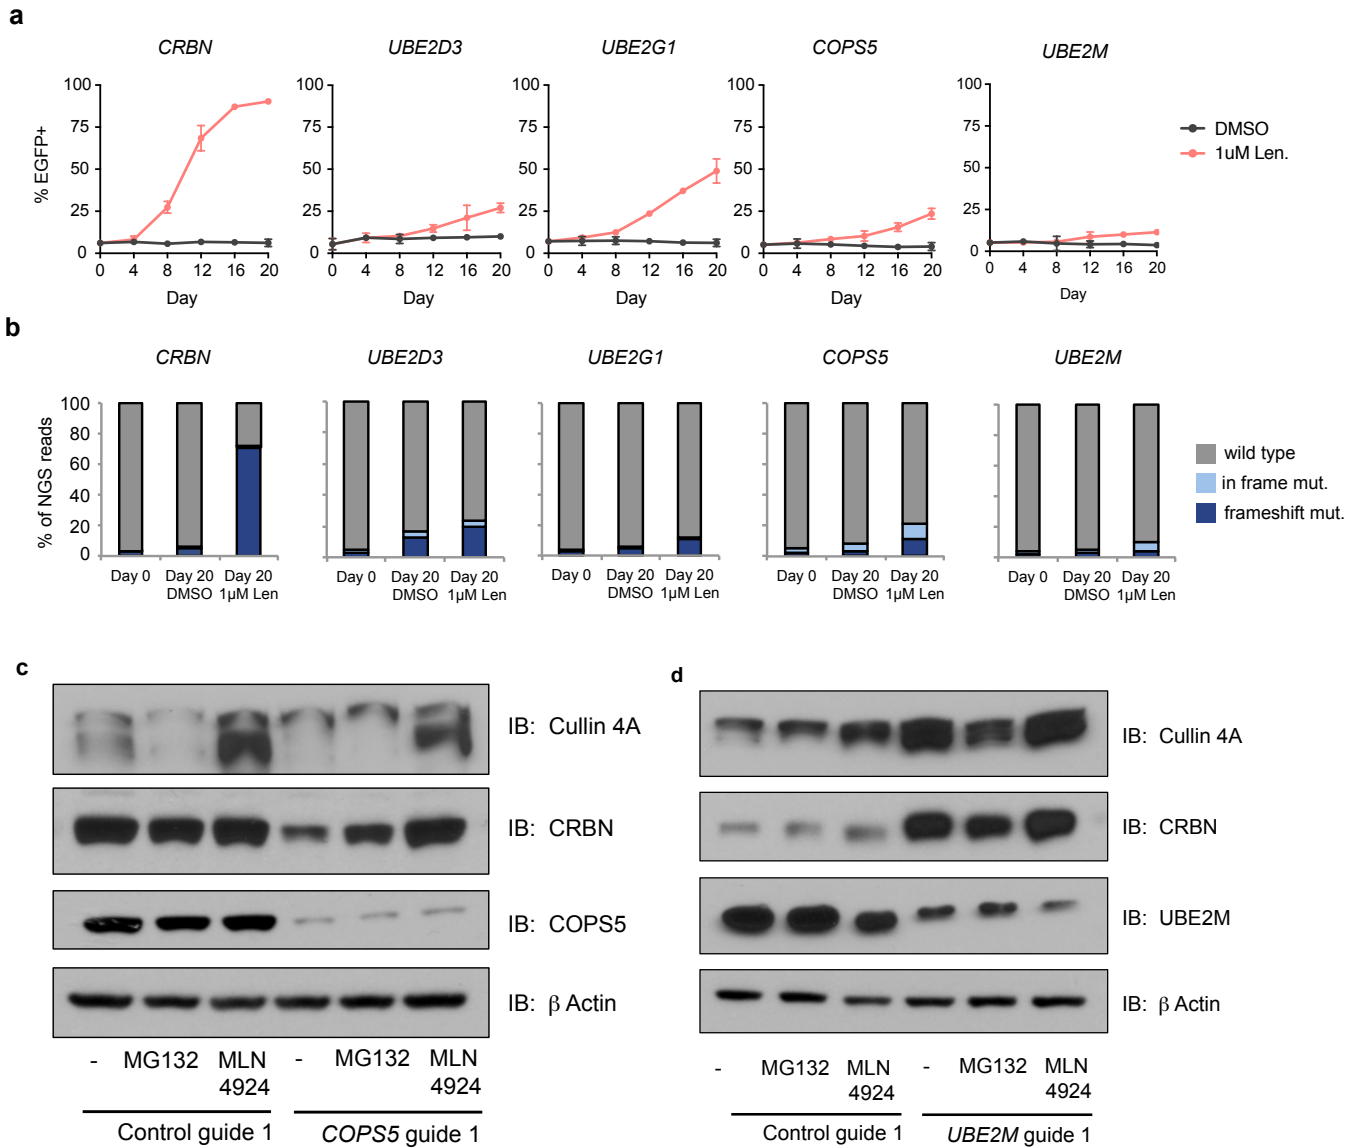

212

213  
214  
215  
216  
217  
218  
219  
220  
221  
222  
223  
224  
225  
226  
227  
228  
229

**Figure S3 | Replicate competition assays and sequencing**

**a**, Replicate experiment of Figure 3a with distinct gene-targeting and control gRNAs: MM1.S-Cas9 cells expressing EGFP were infected with gRNAs targeting indicated genes and mixed at a 5:95 ratio with control gRNA-infected cells. The cells were then grown for 20 days in the presence of DMSO or 1µM lenalidomide and the percentage of EGFP+ cells was quantified every 4 days using flow cytometry. Data points are average of three technical replicates and error bars represent 95% confidence interval.

**b**, gDNA was harvested from the day 0 and day 20 DMSO or 1µM Len samples, the gRNA target site was PCR amplified, and next generation sequencing was used to quantify the percentage of reads containing frameshifting indels. (indel frequency is likely underrepresented due to use of sequencing parameters for gRNA target site limiting product size to 300 base pairs, which may systematically omit detection of large indels).

**c**, HEK293T-Cas9 cells were infected with *COPS5* or control targeting gRNAs. The cells were then treated with 5µM MG132, 5µM MLN4924 or DMSO for 12 hours. Protein lysates were harvested and immunoblotted (IB) for the indicated proteins.

**d**, HEK293T-Cas9 cells were infected with *UBE2M* or control targeting gRNAs. The cells were then treated with 5µM MG132, 5µM MLN4924 or DMSO for 12 hours. Protein lysates were harvested and immunoblotted (IB) for the indicated proteins.

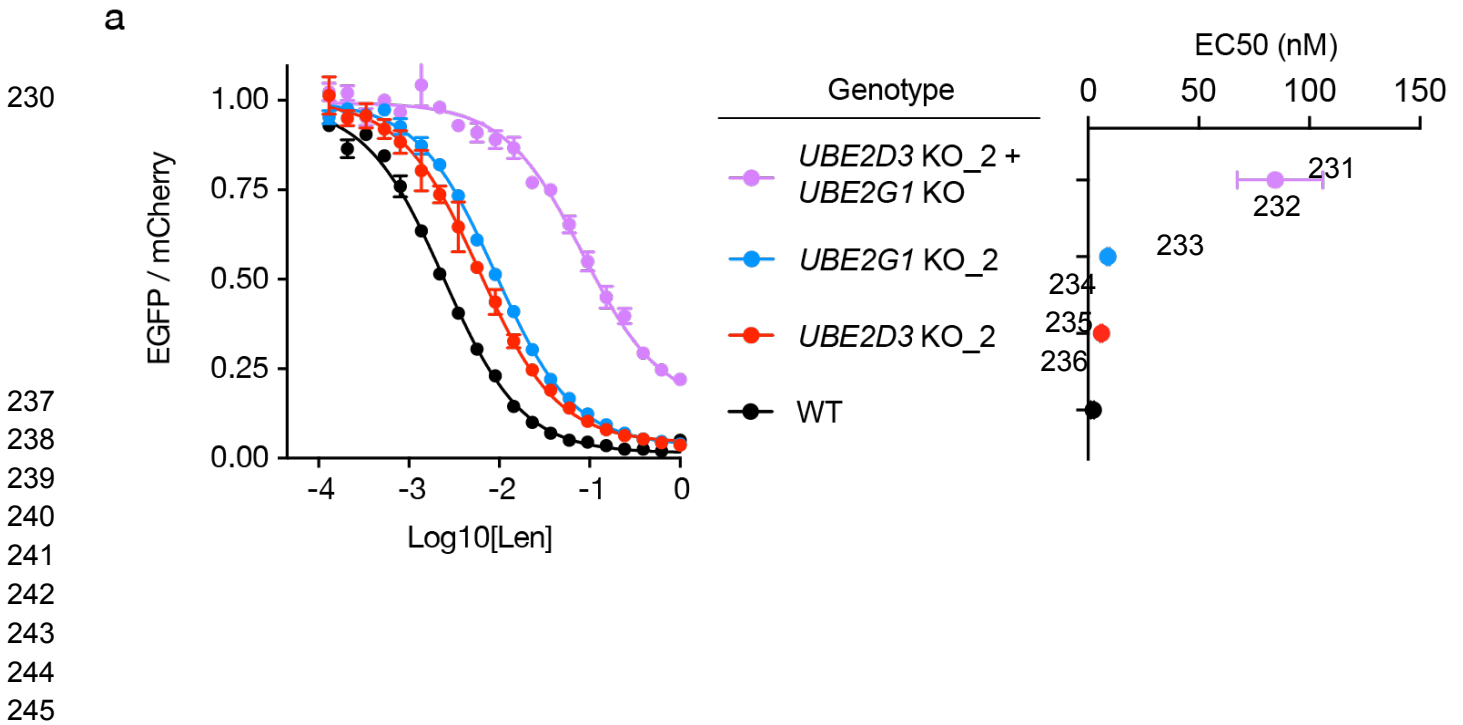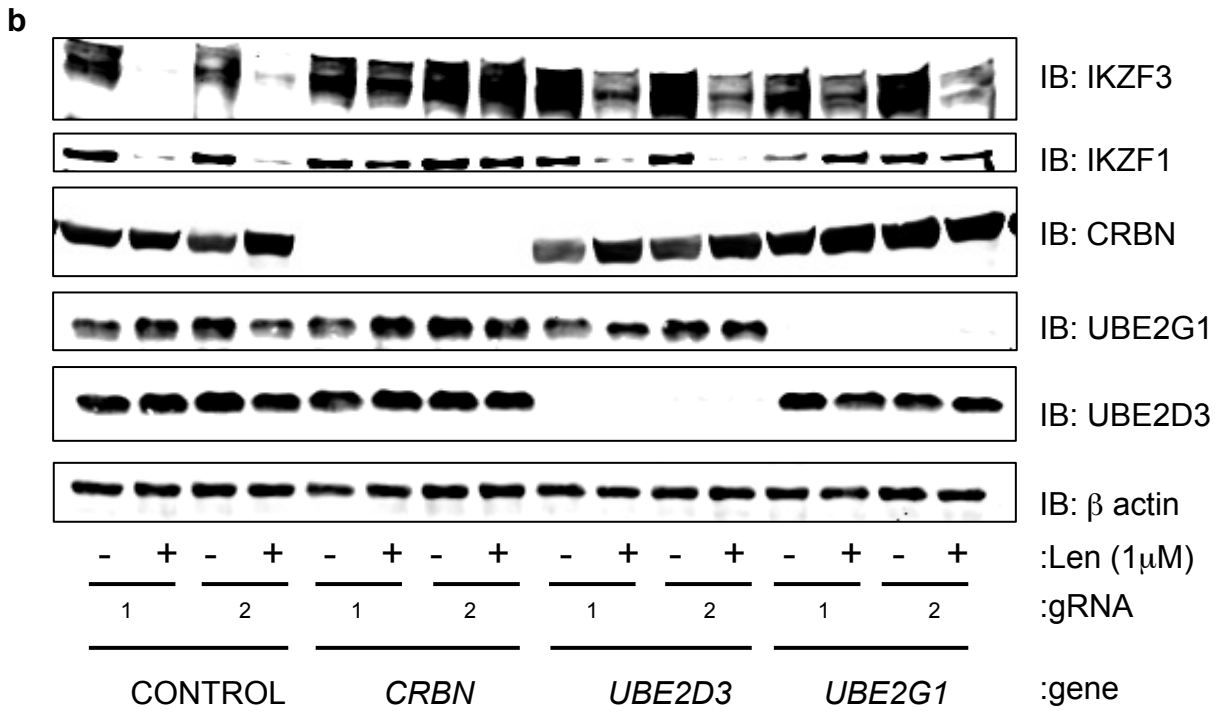

246

247

248 **Figure S4 | Biological replicate of lenalidomide titration in HEK293T single cell clones**

249 **a**, HEK293T single cell clones in which *UBE2G1* and/or *UBE2D3* were knocked out via CRISPR-Cas9 were

250 transduced with the IKZF3 degron reporter and were then treated with a titration of lenalidomide. After 20 hours

251 the EGFP/mCherry ratio was assayed via flow cytometry. Data points are an average of three experimental

252 replicates and error bars represent standard error of the mean.

253 **b**, NC1H929-Cas9 cells were infected with gRNAs targeting the indicated genes, treated with DMSO or 1 $\mu$ M

254 lenalidomide for 20 hours, then lysates were harvested and immunoblotted as indicated. Data are representative

255 of three experimental replicates

256  
257  
258  
259
